# Supplementary material for: Isolation and Structural Elucidation of Unreported Prenylhydroquinone Glycoside from Sedum kamtschaticum Leaves and Its Effect on Hyperphosphorylated Tau Production in Aβ1–42-Treated SH-SY5Y Cells
Source: MDPI journal article supplement (doi:10.3390/separations10080428), 2023-07-28
Supplement: s1 [file s1]

## Supplementary Materials

# Isolation and Structural Elucidation of Unreported Prenylhydroquinone Glycoside from *Sedum kamtschaticum* Leaves and Its Effect on Hyperphosphorylated Tau Production in A $\beta$ <sub>1-42</sub>-Treated SH-SY5Y Cells

Seung-Eun Lee <sup>1,†,\*</sup>, Se Yun Jeong <sup>2,†</sup>, Yoon Seo Jang <sup>2,†</sup>, Kwang-Jin Cho <sup>3</sup>, Jeonghoon Lee <sup>1</sup>, Yunji Lee <sup>1</sup>  
and Ki Hyun Kim <sup>2,\*</sup>

<sup>1</sup> Department of Herbal Crop Research, National Institute of Horticultural & Herbal Science (NIHHS), Eumseong 27709, Republic of Korea; yoong0625@korea.kr (J.L.); kjcho@khu.ac.kr (Y.L.)

<sup>2</sup> School of Pharmacy, Sungkyunkwan University, Suwon 16419, Republic of Korea; dlawtkark@naver.com (S.Y.J.); bbj0423@gmail.com (Y.S.J.)

<sup>3</sup> Korean Medicine-Based Drug Repositioning Cancer Research Center, Seoul 02447, Republic of Korea; artemisia@rda.go.kr

\* Correspondence: herbin3@korea.kr (S.-E.L.); khkim83@skku.edu (K.H.K.); Tel.: +82-43-871-5755 (S.-E.L.); +82-31-290-7700 (K.H.K.)

† These authors contributed equally to this work.

### Supporting Information Contents:

|                                                                                                                           |     |
|---------------------------------------------------------------------------------------------------------------------------|-----|
| <b>Figure S1.</b> The HR-ESIMS data of <b>1</b> .....                                                                     | S3  |
| <b>Figure S2.</b> The UV spectrum of <b>1</b> .....                                                                       | S4  |
| <b>Figure S3.</b> The IR spectrum of <b>1</b> .....                                                                       | S5  |
| <b>Figure S4.</b> The $^1\text{H}$ NMR spectrum of <b>1</b> ( $\text{D}_2\text{O}$ , 600 MHz) .....                       | S6  |
| <b>Figure S5.</b> The $^{13}\text{C}$ NMR spectrum of <b>1</b> ( $\text{D}_2\text{O}$ , 150 MHz) .....                    | S7  |
| <b>Figure S6.</b> The $^1\text{H}$ - $^1\text{H}$ COSY spectrum of <b>1</b> .....                                         | S8  |
| <b>Figure S7.</b> The HSQC spectrum of <b>1</b> .....                                                                     | S9  |
| <b>Figure S8.</b> The HMBC spectrum of <b>1</b> .....                                                                     | S10 |
| <b>Figure S9.</b> The DEPT135 spectrum of <b>1</b> .....                                                                  | S11 |
| <b>Figure S10.</b> LC/MS analysis for absolute configuration determination of the sugar moiety of compound <b>1</b> ..... | S12 |

**Figure S1.** The HR-ESIMS data of **1**

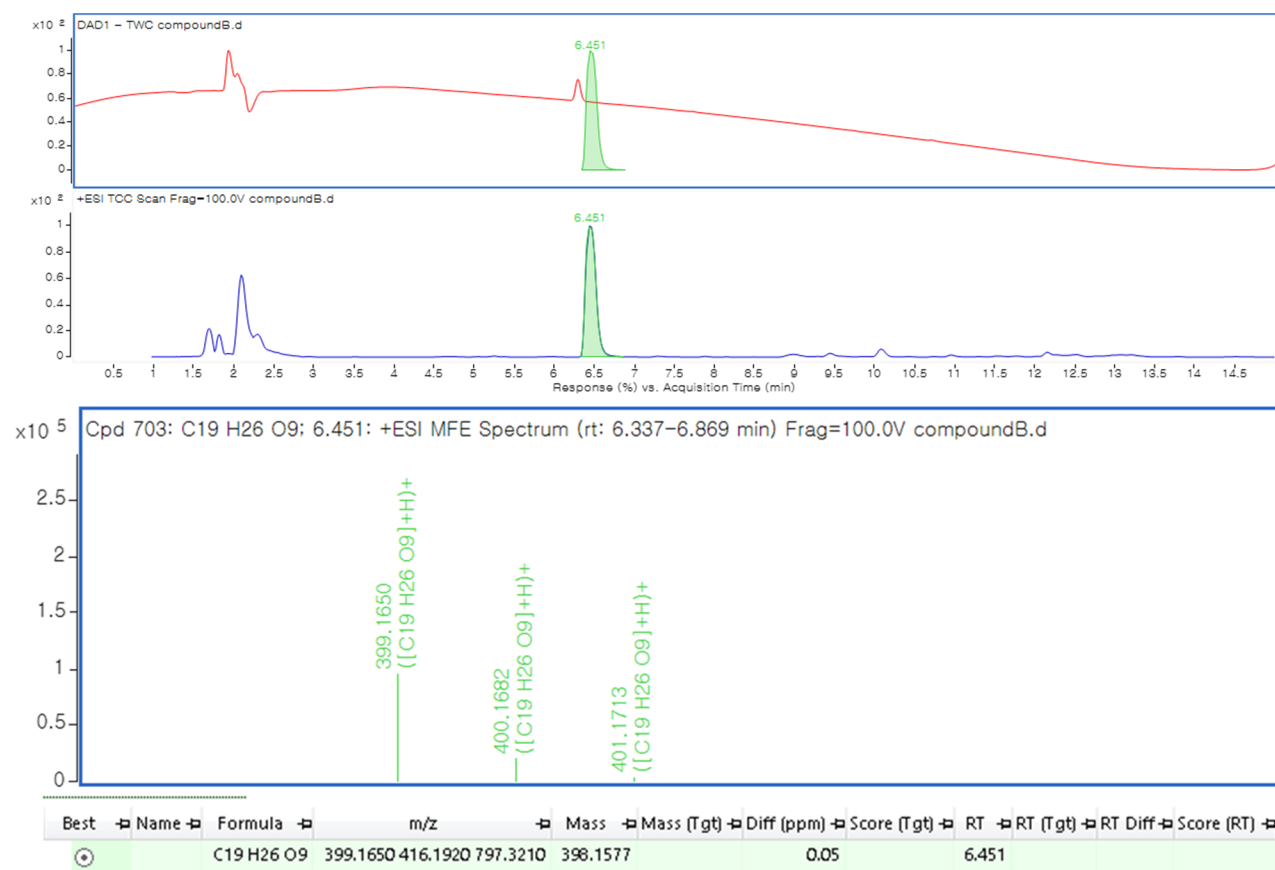

**LC/MS equipment:** Agilent 1290 Infinity II ultra-high performance liquid chromatograph coupled with a G6545B Q-TOF MS system with a dual ESI source (Agilent Technologies)

**Column:** Waters ACQUITY UPLC® BEH C18 column (150 × 2.1 mm, 1.7 μm; Waters, Milford, MA, USA); **Flow rate:** 0.3 mL/min

**Elution gradient :** Mobile phase A: H<sub>2</sub>O with 0.1% formic acid / Mobile phase B: Acetonitrile; 10 % to 100 % mobile phase B from 0 to 10 min; 100 % mobile phase B from 10 to 12 min; 100 % to 10 % mobile phase B from 12 to 12.5 min; 10 % mobile phase B from 12.5 to 15 min.

**Figure S2.** The UV spectrum of **1** (0.02 M in MeOH; the UV wavelength range of 210–400 nm was used)

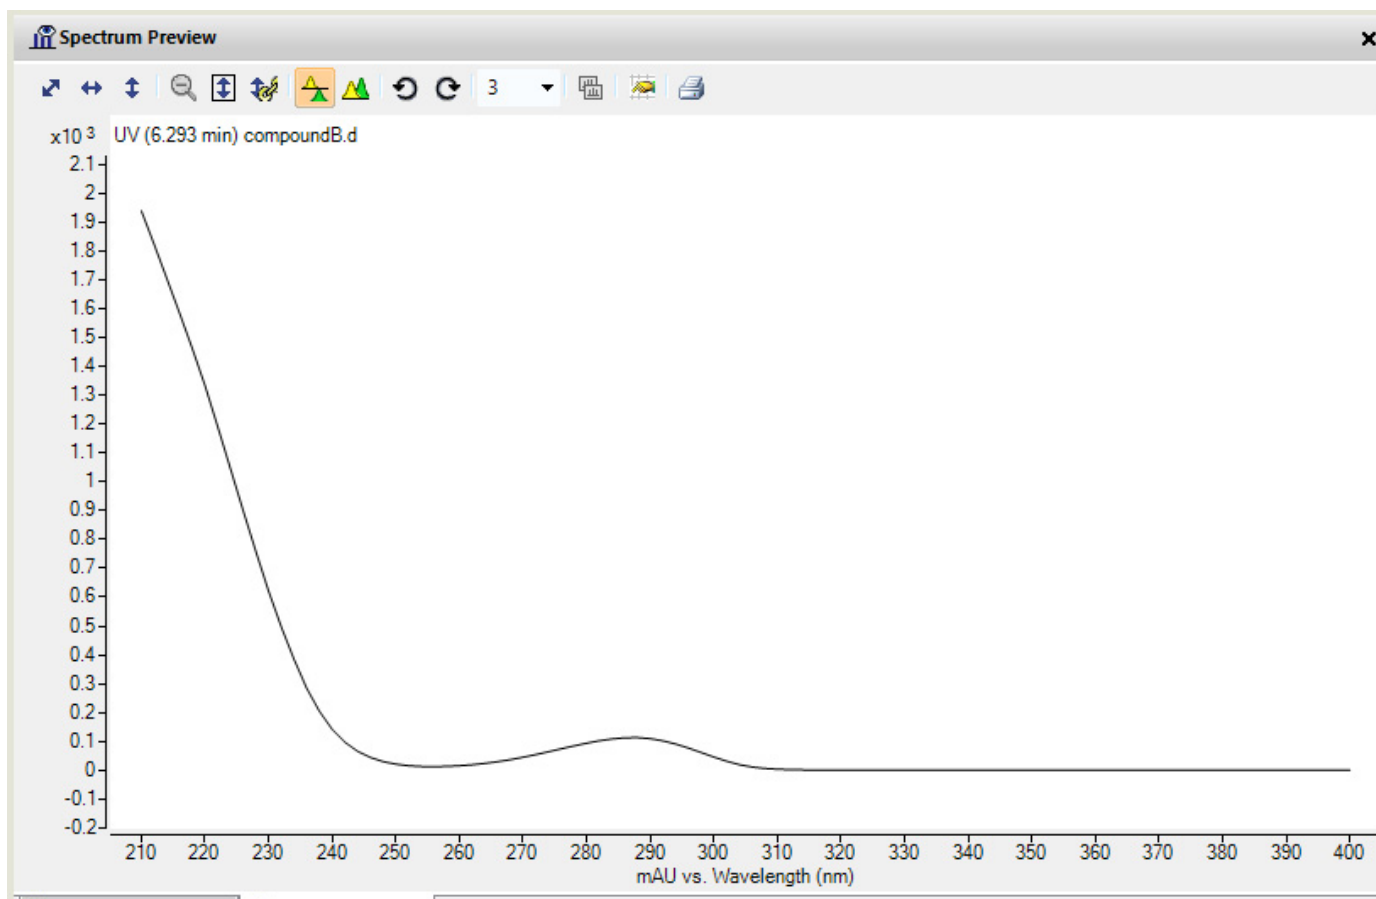

**Figure S3.** The IR spectrum of **1** (FTIR ranges from 500 to 4000  $\text{cm}^{-1}$  by using single reflection ATR)

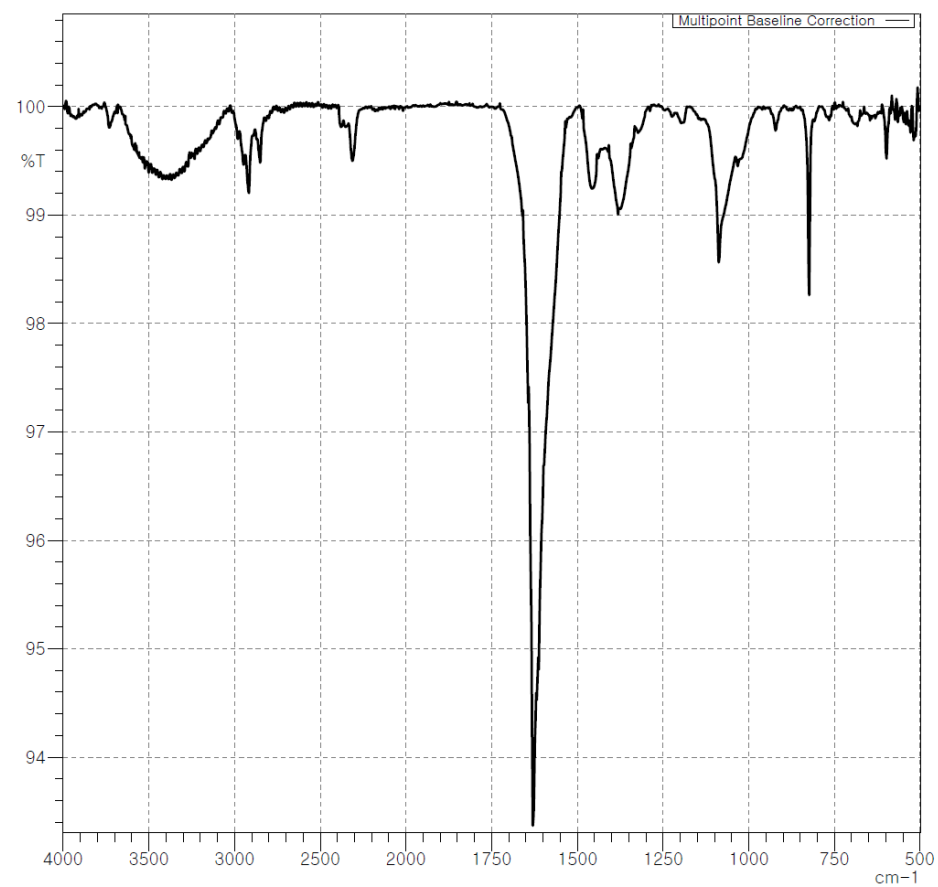

Default Project - 1-5843-4 - 230510\_206805TR\_Kirin Re.ispd

**Figure S4.** The  $^1\text{H}$  NMR spectrum of **1** ( $\text{D}_2\text{O}$ , 600 MHz)

H-NMR of Kirin Re

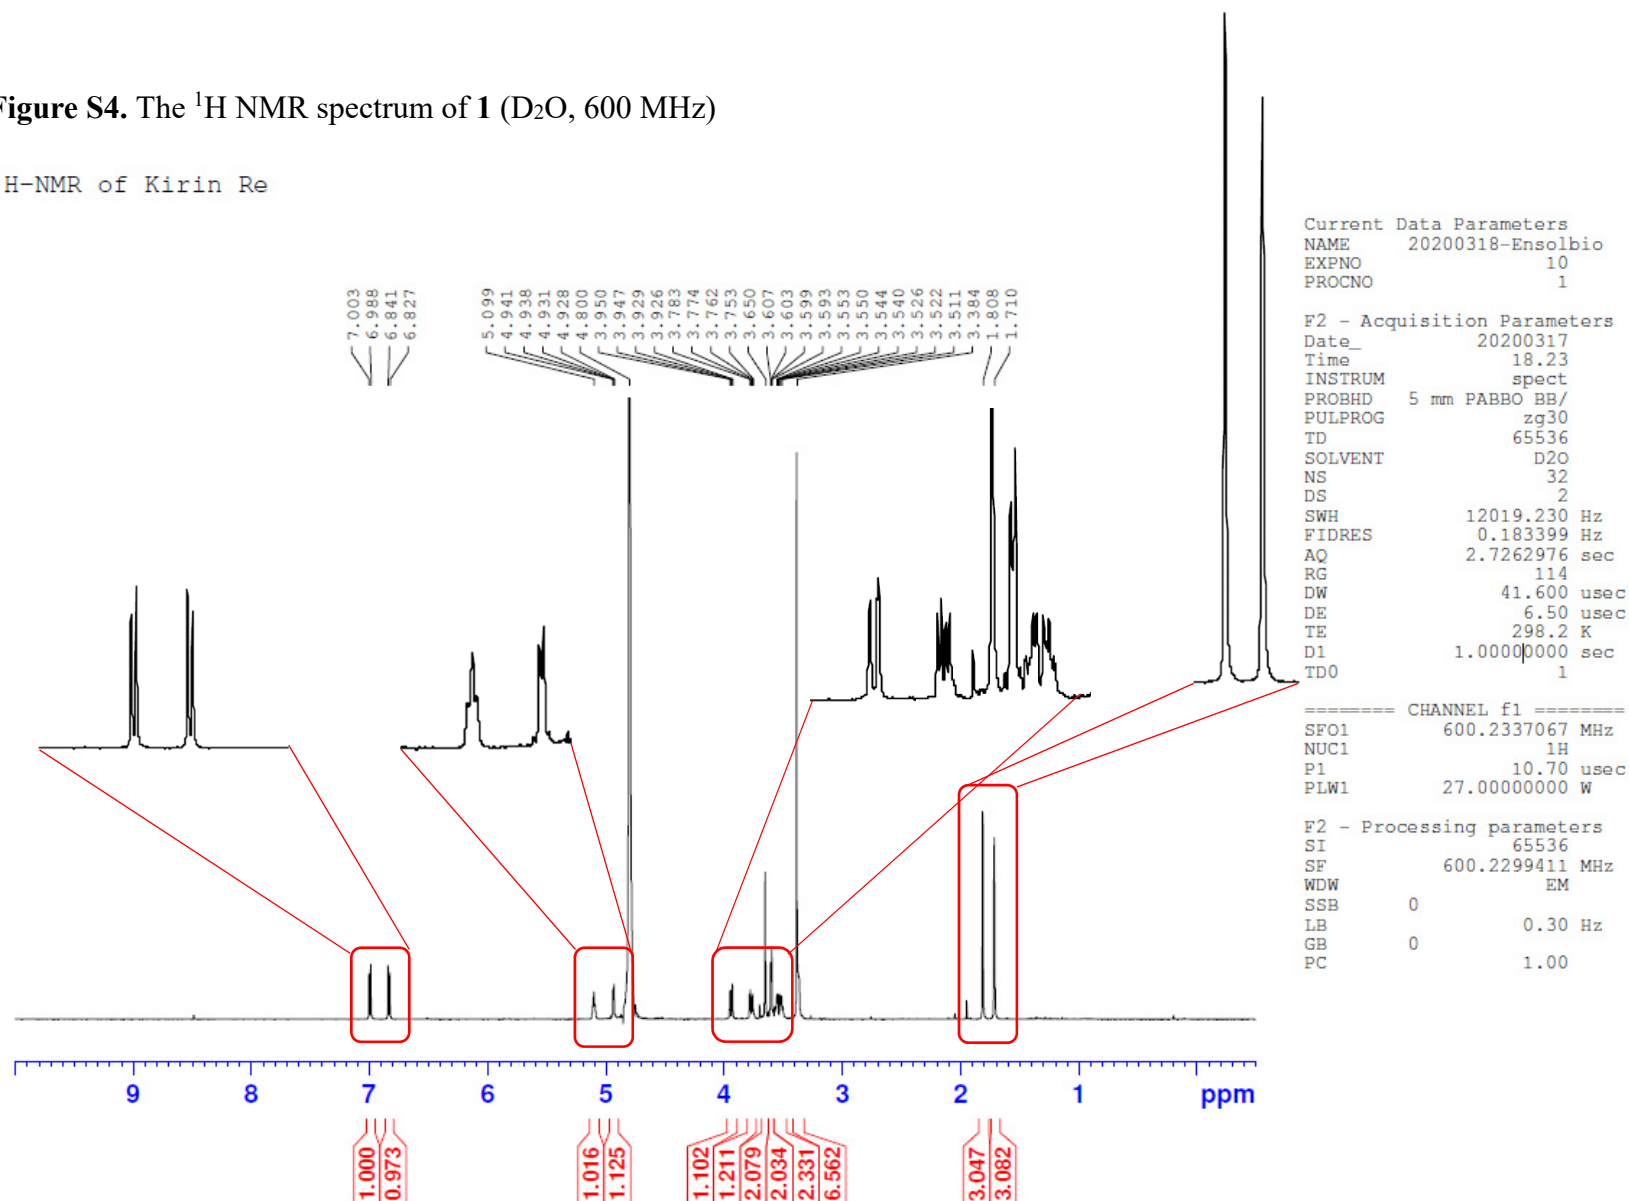

**Figure S5.** The  $^{13}\text{C}$  NMR spectrum of **1** ( $\text{D}_2\text{O}$ , 150 MHz)

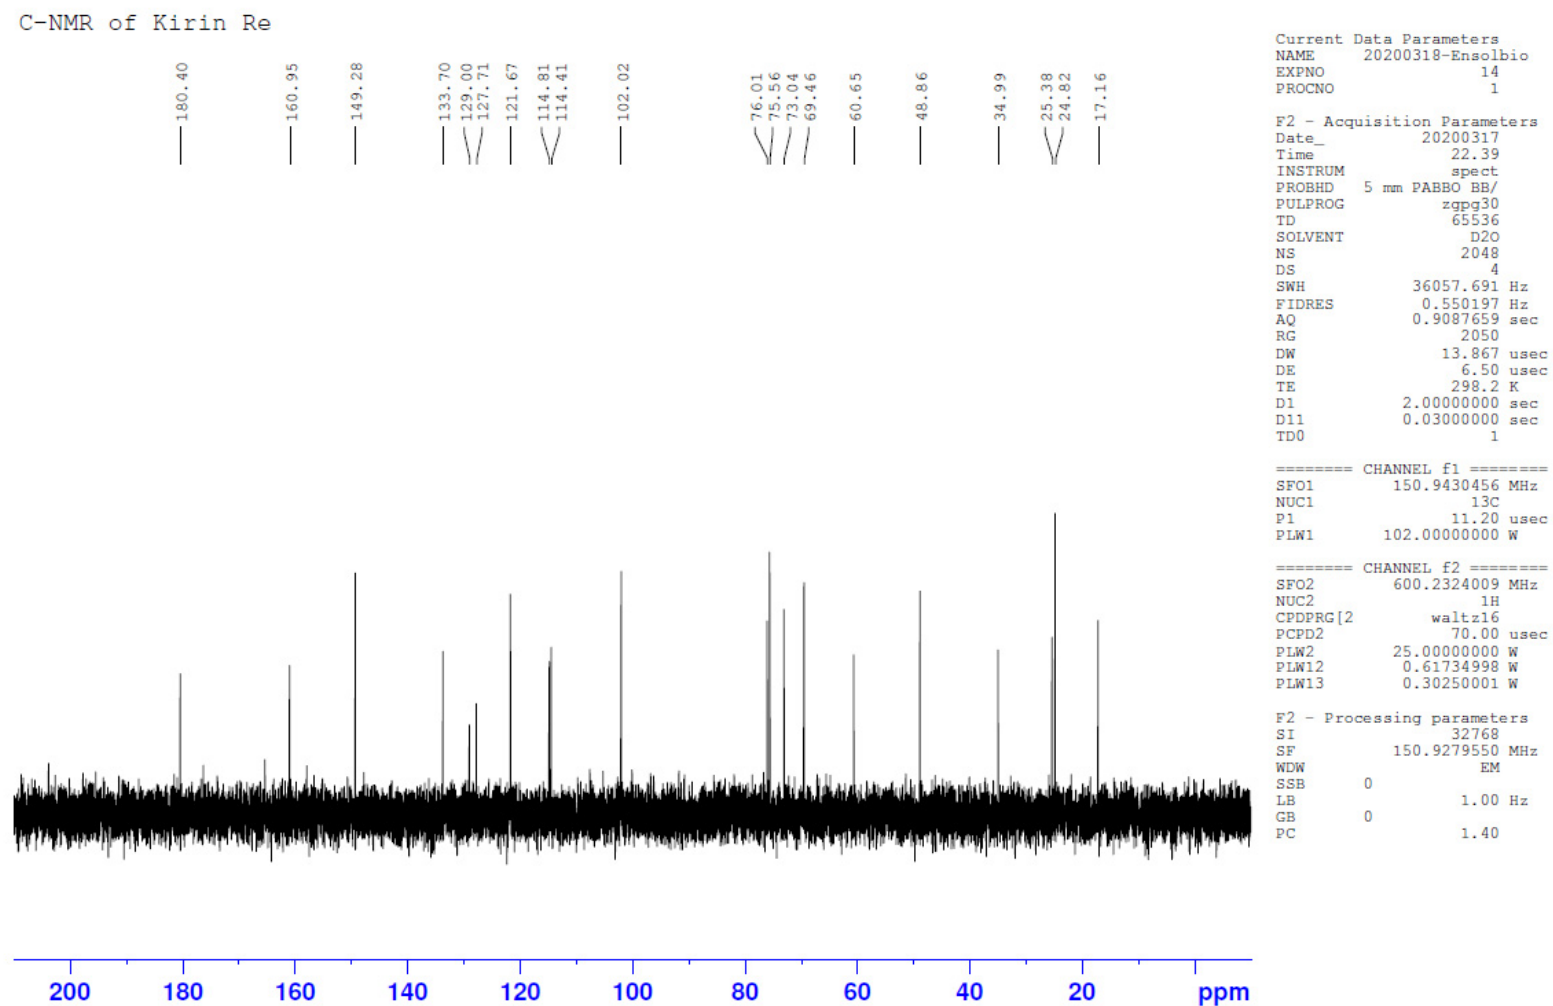

**Figure S6.** The  $^1\text{H}$ - $^1\text{H}$  COSY spectrum of **1** ( $\text{D}_2\text{O}$ )

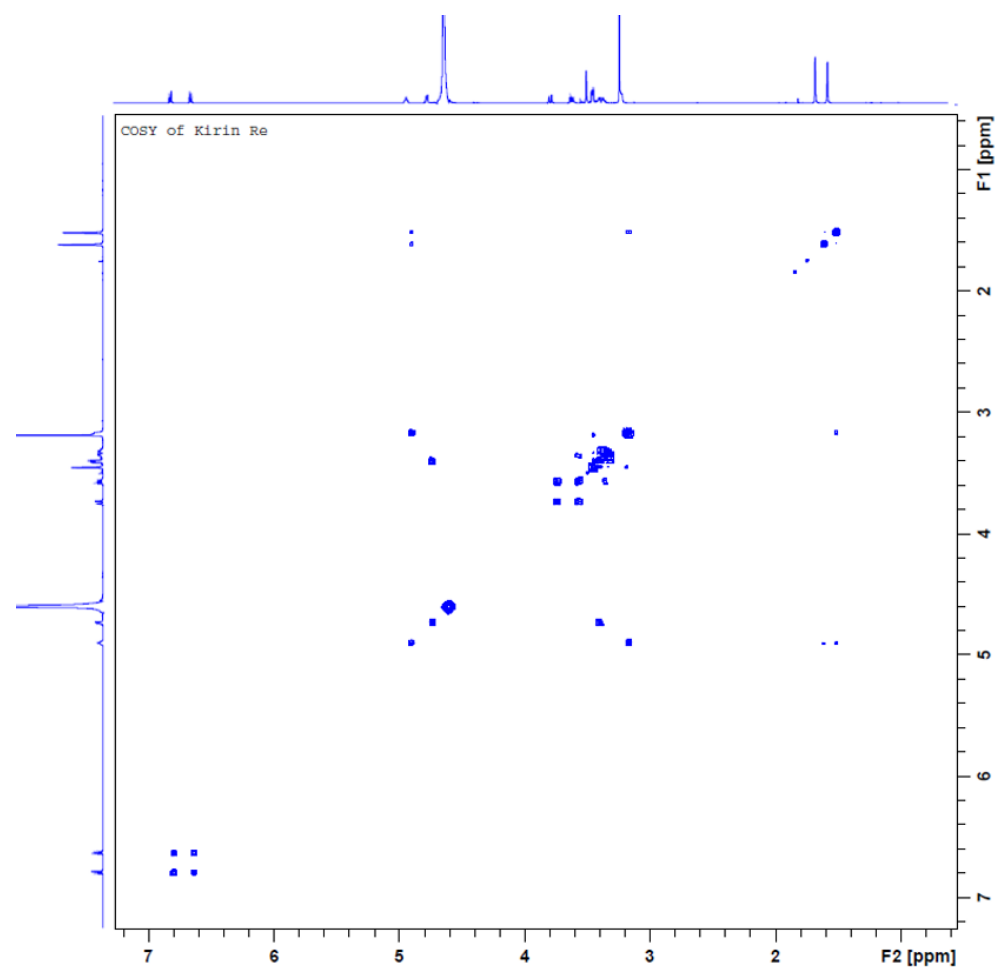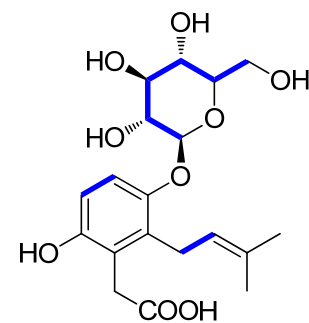



**Figure S7.** The HSQC spectrum of **1** (D<sub>2</sub>O)

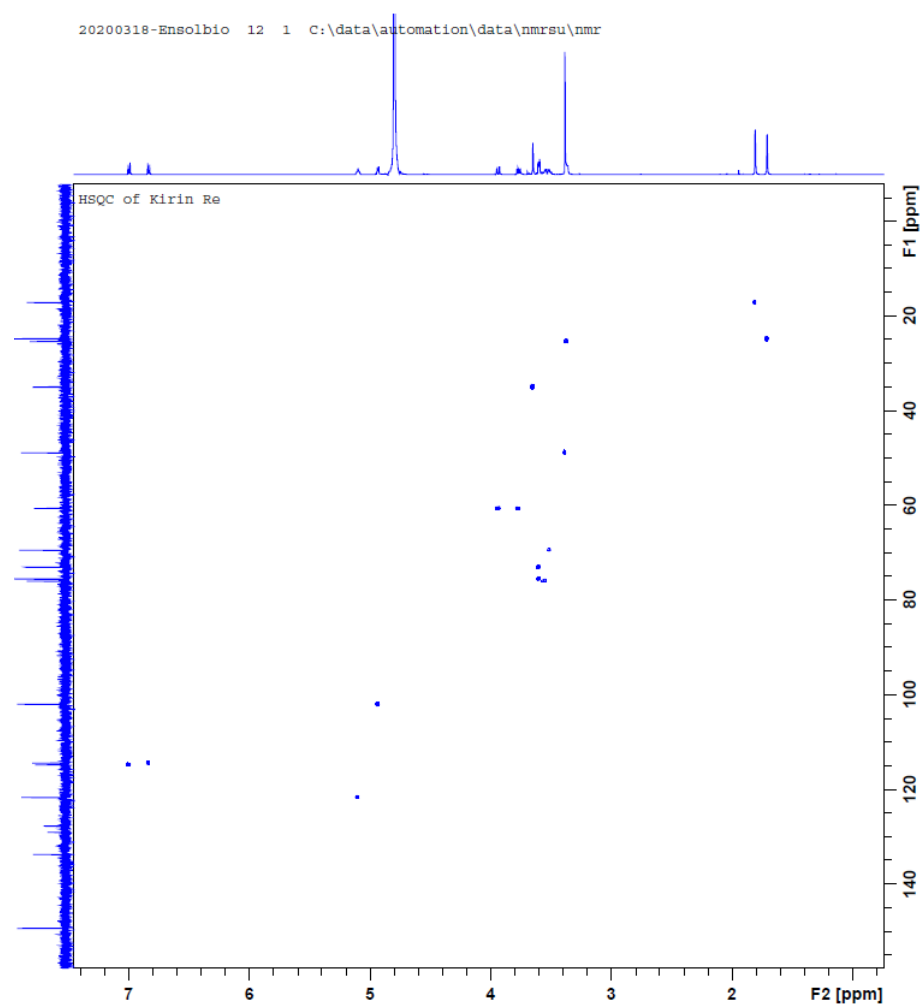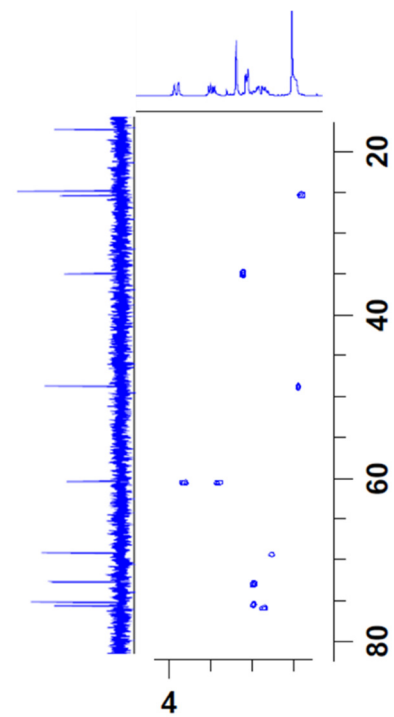

Expanded HSQC at the region of 3.0 – 4.0 ppm

**Figure S8.** The HMBC spectrum of **1** (D<sub>2</sub>O)

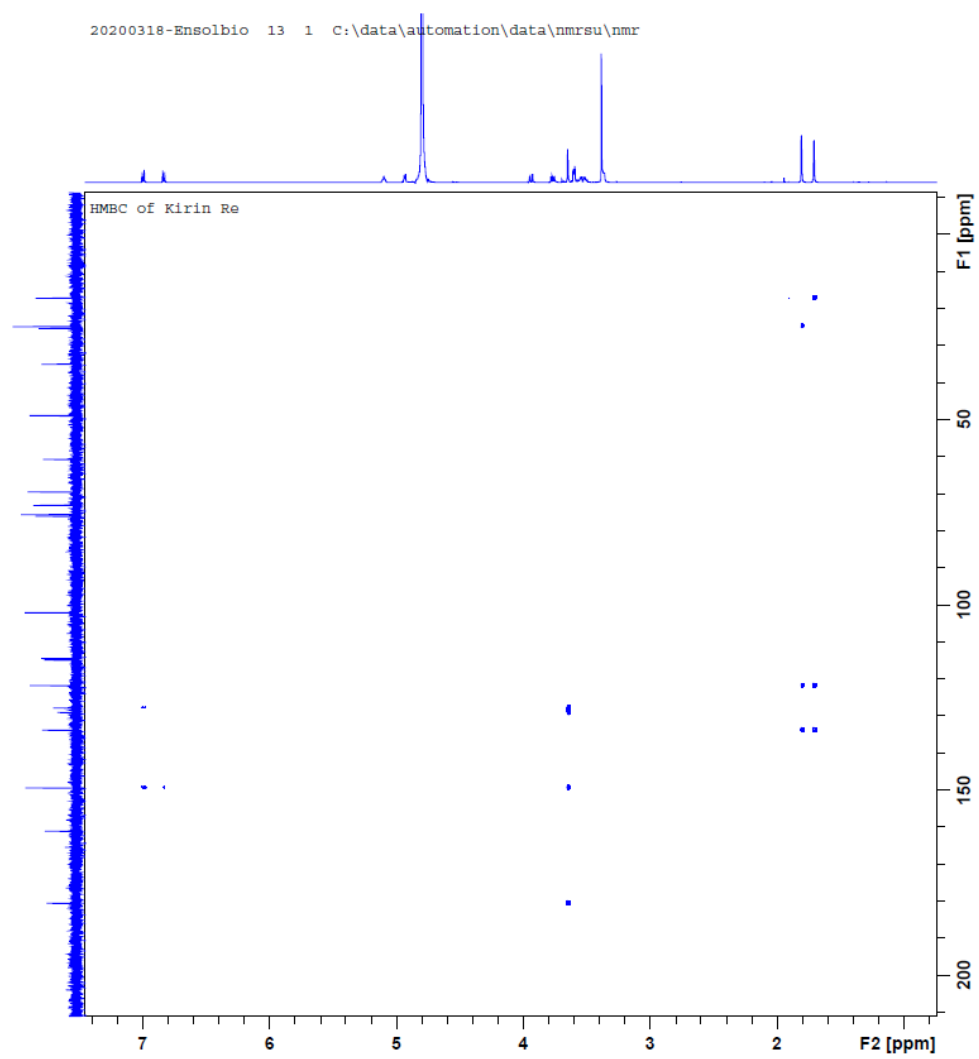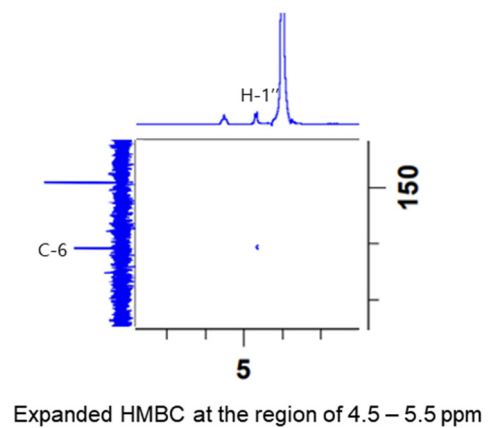

**Figure S9.** The DEPT135 spectrum of **1** (D<sub>2</sub>O)

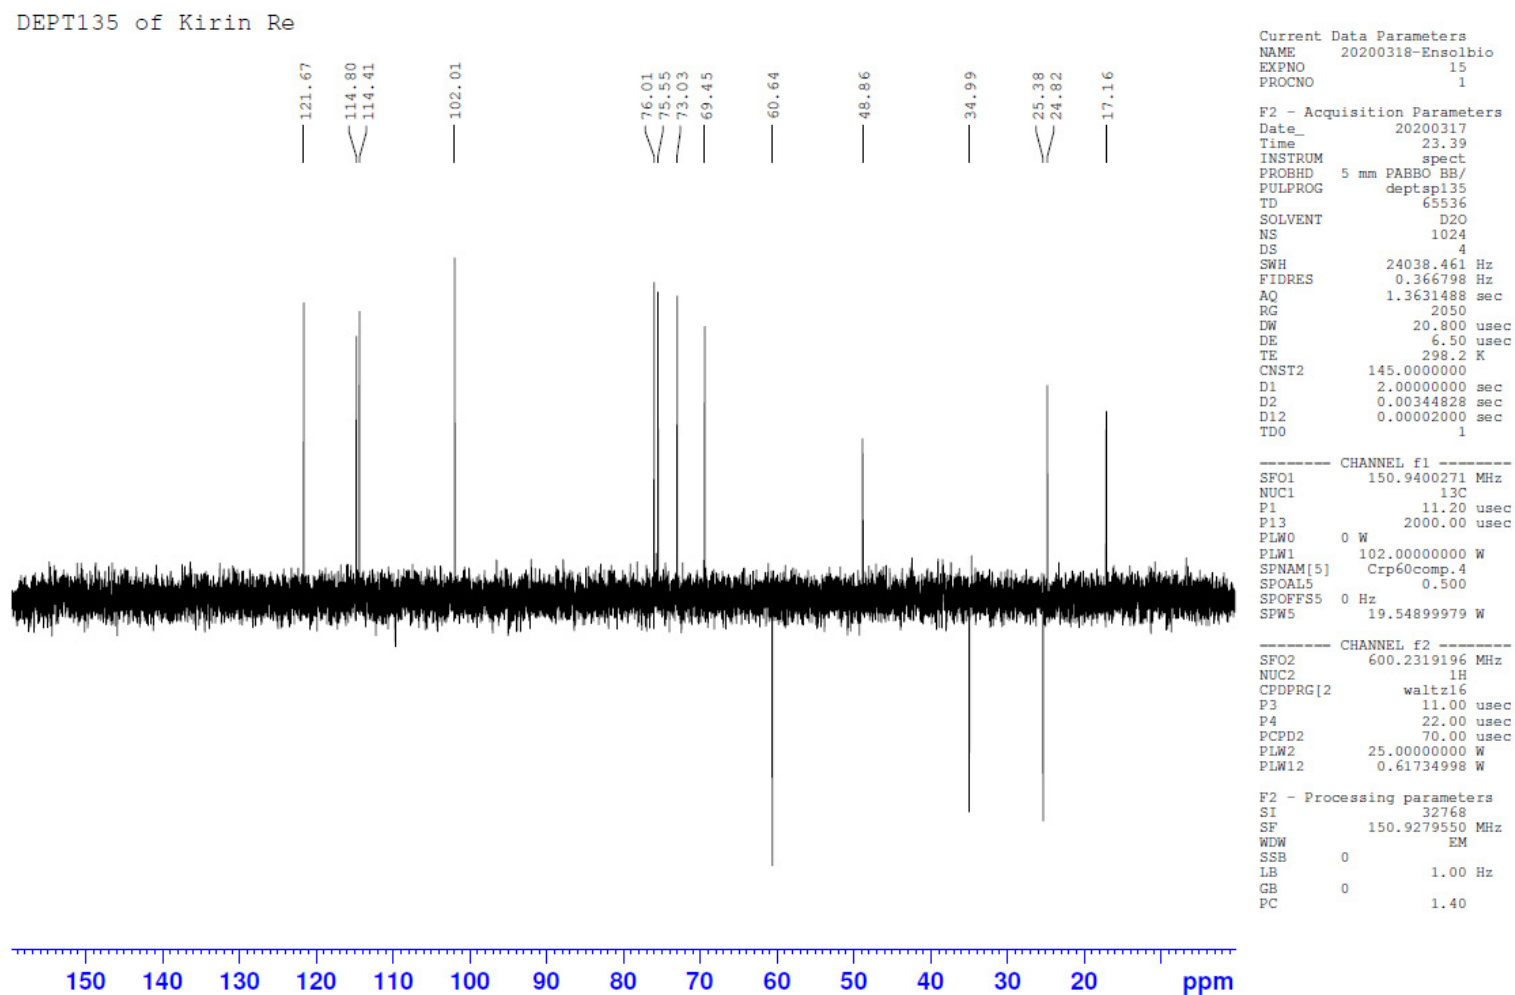

**Figure S10.** LC/MS analysis for absolute configuration determination of the sugar moiety of compound **1**

(A) EIC (Exact Ion Chromatogram) data (positive-ion mode) for thiocarbamoyl-thiazolidine derivative of sugar from compound **1**

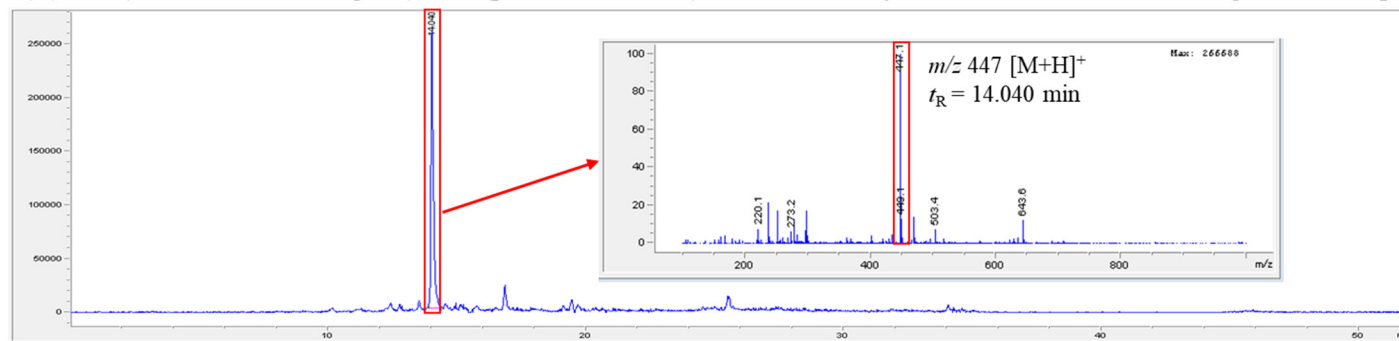

(B) EIC data (positive-ion mode) for thiocarbamoyl-thiazolidine derivative of β-D-glucose (standard sample)

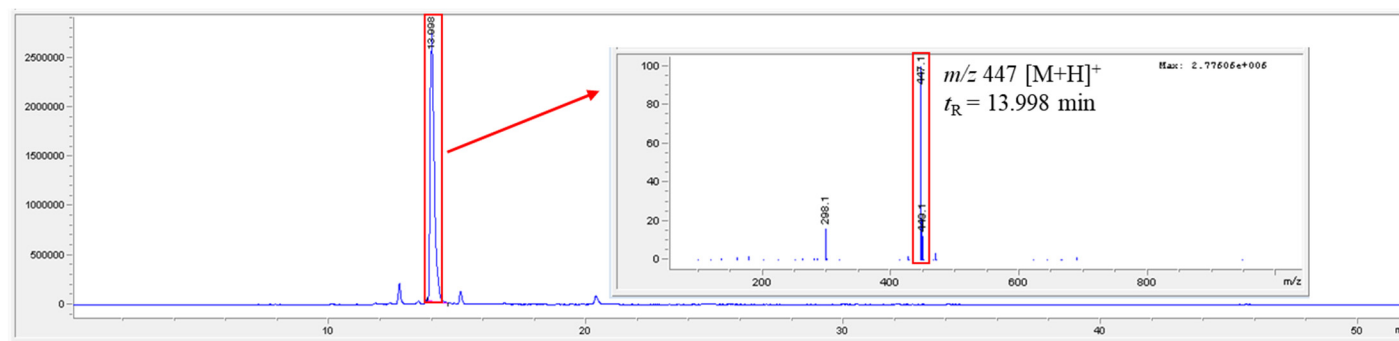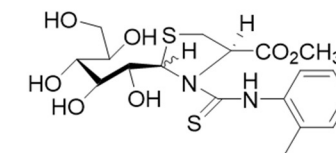

Chemical Formula: C<sub>18</sub>H<sub>26</sub>N<sub>2</sub>O<sub>7</sub>S<sub>2</sub>  
Exact Mass: 446.12

**LC/MS equipment:** Agilent 1200 Series HPLC system equipped with a diode array detector and 6130 Series ESI mass spectrometer

**Column:** analytical Kinetex C18 100 Å column (100 × 2.1 mm, 5 μm; Phenomenex, Torrance, CA, USA).

**Flow rate:** 0.3 mL/min

**Elution gradient :** Mobile phase A: H<sub>2</sub>O with 0.1% formic acid / Mobile phase B: Methanol; 0 % to 80 % mobile phase B from 0 to 30 min; 80 % to 100% mobile phase B from 30 to 31 min; 100 % mobile phase B from 31 to 41 min; 100 % to 0 % mobile phase B from 41 to 42 min; 0 % mobile phase B from 42 to 52 min.
